# Supplementary material
Source: PubMed Central journal article supplement (PMC6121999)
Supplement: zam018188732s1.pdf [file zam018188732s1.pdf]

## Supplementary Material

**TABLE S.1. Median (25<sup>th</sup>, 75<sup>th</sup> percentile) relative abundance of the seven most abundant bacterial families according to group**

| Family                     | Control    | BLISS      | Mean difference<br>(95% CI) <sup>a</sup> | p-value |
|----------------------------|------------|------------|------------------------------------------|---------|
| <i>Bifidobacteriaceae</i>  |            |            |                                          |         |
| 7 mth                      | 38 (9,45)  | 44 (38,55) | 9.9 (-3.9,24)                            | 0.156   |
| 12 mth                     | 22 (12,32) | 20 (8,30)  | 0.2 (-9.0,9.4)                           | 0.966   |
| <i>Enterobacteriaceae</i>  |            |            |                                          |         |
| 7 mth                      | 10 (3,20)  | 6 (4,20)   | -3.0 (-12,5.9)                           | 0.502   |
| 12 mth                     | 1 (0,2)    | 0 (0,3)    | -0.0 (-0.9,0.9)                          | 0.948   |
| <i>Veillonellaceae</i>     |            |            |                                          |         |
| 7 mth                      | 4 (1,6)    | 1 (0,4)    | -0.9 (-0.3,1.4)                          | 0.445   |
| 12 mth                     | 1 (0,3)    | 1 (1,3)    | 0.2 (-1.1,1.5)                           | 0.775   |
| <i>Bacteroidaceae</i>      |            |            |                                          |         |
| 7 mth                      | 12 (0,24)  | 4 (0,19)   | -3.8 (-16,8.6)                           | 0.546   |
| 12 mth                     | 8 (1,14)   | 8 (0,20)   | -0.0 (-9.3,9.3)                          | 0.999   |
| <i>Erysipelotrichaceae</i> |            |            |                                          |         |
| 7 mth                      | 1 (0,2)    | 1 (0,4)    | 0.5 (-1.0,1.9)                           | 0.500   |
| 12 mth                     | 2 (1,3)    | 2 (1,4)    | 0.6 (-0.6,1.7)                           | 0.345   |
| <i>Lachnospiraceae</i>     |            |            |                                          |         |
| 7 mth                      | 11 (1,26)  | 7 (1,25)   | -0.1 (-12,12)                            | 0.981   |
| 12 mth                     | 35 (25,42) | 29 (14,40) | -8.3 (-19,2.2)                           | 0.119   |
| <i>Ruminococcaceae</i>     |            |            |                                          |         |
| 7 mth                      | 0 (0,1)    | 0 (0,1)    | -0.1 (-0.4,0.6)                          | 0.786   |
| 12 mth                     | 12 (4,21)  | 10 (1,16)  | -4.9 (-13,3.4)                           | 0.240   |

Abbreviations: BLISS, Baby-Led Introduction to Solids; mth, month.

<sup>a</sup> Mean difference using quantile regression

**TABLE S.2. Median (25<sup>th</sup>,75<sup>th</sup> percentile) relative abundance of the seven most abundant bacterial families at 7 and 12 months**

| Family                                 | 7 months<br>(n=73) | 12 months<br>(n=68) | Mean difference<br>(95% CI) <sup>a</sup><br>(n=141) | p-value          |
|----------------------------------------|--------------------|---------------------|-----------------------------------------------------|------------------|
| <i>Bifidobacteriaceae</i> <sup>b</sup> | 42 (24,55)         | 21 (11,31)          | -16 (-21,-10)                                       | <b>&lt;0.001</b> |
| <i>Enterobacteriaceae</i>              | 7.2 (2.9,20)       | 0.6 (0.2,2.5)       | -8.9 (-12,-5.8)                                     | <b>&lt;0.001</b> |
| <i>Veillonellaceae</i>                 | 2.2 (0.5,5.2)      | 1.1 (0.6,3.1)       | -1.9 (-3.4,-0.3)                                    | <b>0.020</b>     |
| <i>Bacteroidaceae</i>                  | 6.0 (0.0,22)       | 8.0 (1.0,19)        | -2.5 (-6.9,1.9)                                     | 0.272            |
| <i>Erysipelotrichaceae</i>             | 0.9 (0.1,3.2)      | 1.9 (1.1,3.3)       | 0.4 (-1.0,1.7)                                      | 0.586            |
| <i>Lachnospiraceae</i>                 | 9.0 (1.5,26)       | 32 (19,41)          | 16 (12,21)                                          | <b>&lt;0.001</b> |
| <i>Ruminococcaceae</i>                 | 0.1 (0.0,0.9)      | 10 (1.6,19)         | 9.4 (7.3,12)                                        | <b>&lt;0.001</b> |

<sup>a</sup> Mean difference using mixed regression model with participant identification number as a random effect.

<sup>b</sup> p-for-interaction between group and time was close to significance at p = 0.050, with the BLISS group having a greater mean decrease (95% CI) (-21 (-29,-13)) compared to the Control group (-11 (-18,-3.3)).

Table S.3: OTUs in which a difference of >=10 individuals (presence) was observed between dietary groups

| Phylum        | Class         | Order           | Family          | Genus            | Species              | OTU <sup>a</sup> | BLISS 07M n=36 |           |                | Control 07M n=37 |           |                | BLISS 12M n=34 |           |                | Control 12M n=34 |           |                | Delta* 07M | Delta* 12M |
|---------------|---------------|-----------------|-----------------|------------------|----------------------|------------------|----------------|-----------|----------------|------------------|-----------|----------------|----------------|-----------|----------------|------------------|-----------|----------------|------------|------------|
|               |               |                 |                 |                  |                      |                  | Prevalence     | count > 0 | Mean Abundance | Prevalence       | count > 0 | Mean Abundance | Prevalence     | count > 0 | Mean Abundance | Prevalence       | count > 0 | Mean Abundance |            |            |
| Firmicutes    | Clostridia    | Clostridiales   | Lachnospiraceae | Blautia          | Ruminococcus         | OTU_981117       | 22.22%         | 8         | 0.001%         | 24.32%           | 9         | 0.002%         | 52.94%         | 18        | 0.007%         | 85.29%           | 29        | 0.020%         | -1         | -11        |
| Firmicutes    | Clostridia    | Clostridiales   | Lachnospiraceae | Blautia          | uncultured bacterium | OTU_189986       | 2.78%          | 1         | 0.000%         | 0.00%            | 0         | 0.000%         | 8.82%          | 3         | 0.001%         | 41.18%           | 14        | 0.002%         | 1          | -11        |
| Firmicutes    | Clostridia    | Clostridiales   | Lachnospiraceae | Eubacterium      | rectale              | OTU_126593       | 5.56%          | 2         | 0.001%         | 21.62%           | 8         | 0.004%         | 38.24%         | 13        | 0.008%         | 67.65%           | 23        | 0.029%         | -6         | -10        |
| Firmicutes    | Clostridia    | Clostridiales   | Lachnospiraceae | Incertae Sedis   | uncultured bacterium | OTU_184758       | 5.56%          | 2         | 0.004%         | 5.41%            | 2         | 0.001%         | 17.65%         | 6         | 0.000%         | 47.06%           | 16        | 0.003%         | 0          | -10        |
| Firmicutes    | Clostridia    | Clostridiales   | Lachnospiraceae | Roseburia        | faecis               | OTU_66323        | 13.89%         | 5         | 0.004%         | 18.92%           | 7         | 0.005%         | 47.06%         | 16        | 0.015%         | 76.47%           | 26        | 0.043%         | -2         | -10        |
| Firmicutes    | Clostridia    | Clostridiales   | Lachnospiraceae | Roseburia        | uncultured bacterium | OTU_73320        | 11.11%         | 4         | 0.002%         | 10.81%           | 4         | 0.001%         | 35.29%         | 12        | 0.010%         | 76.47%           | 26        | 0.024%         | 0          | -14        |
| Firmicutes    | Clostridia    | Clostridiales   | Lachnospiraceae | Roseburia        | uncultured organism  | OTU_54           | 22.22%         | 8         | 0.016%         | 45.95%           | 17        | 0.007%         | 41.18%         | 14        | 0.298%         | 73.53%           | 25        | 0.651%         | -9         | -11        |
| Firmicutes    | Clostridia    | Clostridiales   | Lachnospiraceae | Roseburia        |                      | OTU_4232         | 16.67%         | 6         | 0.001%         | 21.62%           | 8         | 0.000%         | 32.35%         | 11        | 0.008%         | 70.59%           | 24        | 0.152%         | -2         | -13        |
| Firmicutes    | Clostridia    | Clostridiales   | Lachnospiraceae | Roseburia        |                      | OTU_98034        | 8.33%          | 3         | 0.001%         | 10.81%           | 4         | 0.005%         | 35.29%         | 12        | 0.020%         | 70.59%           | 24        | 0.023%         | -1         | -12        |
| Firmicutes    | Clostridia    | Clostridiales   | Lachnospiraceae | Roseburia        |                      | OTU_252387       | 0.00%          | 0         | 0.000%         | 0.00%            | 0         | 0.000%         | 2.94%          | 1         | 0.000%         | 35.29%           | 12        | 0.002%         | 0          | -11        |
| Firmicutes    | Clostridia    | Clostridiales   | Lachnospiraceae | Roseburia        |                      | OTU_141281       | 5.56%          | 2         | 0.001%         | 5.41%            | 2         | 0.001%         | 20.59%         | 7         | 0.006%         | 50.00%           | 17        | 0.011%         | 0          | -10        |
| Firmicutes    | Clostridia    | Clostridiales   | Lachnospiraceae | uncultured       | uncultured bacterium | OTU_221083       | 0.00%          | 0         | 0.000%         | 0.00%            | 0         | 0.000%         | 0.00%          | 0         | 0.000%         | 38.24%           | 13        | 0.001%         | 0          | -13        |
| Firmicutes    | Clostridia    | Clostridiales   | Lachnospiraceae | uncultured       | uncultured bacterium | OTU_44413        | 5.56%          | 2         | 0.000%         | 13.51%           | 5         | 0.005%         | 35.29%         | 12        | 0.011%         | 64.71%           | 22        | 0.035%         | -3         | -10        |
| Firmicutes    | Clostridia    | Clostridiales   | Lachnospiraceae | uncultured       | uncultured bacterium | OTU_222918       | 0.00%          | 0         | 0.000%         | 5.41%            | 2         | 0.000%         | 29.41%         | 10        | 0.008%         | 58.82%           | 20        | 0.016%         | -2         | -10        |
| Firmicutes    | Clostridia    | Clostridiales   | Lachnospiraceae |                  |                      | OTU_278989       | 0.00%          | 0         | 0.000%         | 5.41%            | 2         | 0.000%         | 17.65%         | 6         | 0.001%         | 55.88%           | 19        | 0.006%         | -2         | -13        |
| Firmicutes    | Clostridia    | Clostridiales   | Lachnospiraceae |                  |                      | OTU_142101       | 2.78%          | 1         | 0.000%         | 5.41%            | 2         | 0.001%         | 26.47%         | 9         | 0.003%         | 61.76%           | 21        | 0.010%         | -1         | -12        |
| Firmicutes    | Clostridia    | Clostridiales   | Lachnospiraceae |                  |                      | OTU_81464        | 8.33%          | 3         | 0.001%         | 5.41%            | 2         | 0.003%         | 26.47%         | 9         | 0.002%         | 61.76%           | 21        | 0.007%         | 1          | -12        |
| Firmicutes    | Clostridia    | Clostridiales   | Lachnospiraceae |                  |                      | OTU_131961       | 2.78%          | 1         | 0.000%         | 0.00%            | 0         | 0.000%         | 8.82%          | 3         | 0.001%         | 38.24%           | 13        | 0.002%         | 1          | -10        |
| Firmicutes    | Clostridia    | Clostridiales   | Lachnospiraceae |                  |                      | OTU_204587       | 0.00%          | 0         | 0.000%         | 5.41%            | 2         | 0.000%         | 14.71%         | 5         | 0.000%         | 44.12%           | 15        | 0.002%         | -2         | -10        |
| Firmicutes    | Clostridia    | Clostridiales   | Ruminococcaceae | Faecalibacterium | prausnitzii          | OTU_182325       | 0.00%          | 0         | 0.000%         | 5.41%            | 2         | 0.000%         | 26.47%         | 9         | 0.006%         | 61.76%           | 21        | 0.010%         | -2         | -12        |
| Firmicutes    | Clostridia    | Clostridiales   | Ruminococcaceae | Faecalibacterium | prausnitzii          | OTU_302854       | 2.78%          | 1         | 0.000%         | 10.81%           | 4         | 0.001%         | 23.53%         | 8         | 0.003%         | 55.88%           | 19        | 0.006%         | -3         | -11        |
| Bacteroidetes | Bacteroidia   | Bacteroidales   | Bacteroidaceae  | Bacteroides      | thetaiotaomicron     | OTU_87946        | 22.22%         | 8         | 0.006%         | 48.65%           | 18        | 0.024%         | 35.29%         | 12        | 0.002%         | 38.24%           | 13        | 0.008%         | -10        | -1         |
| Firmicutes    | Negativicutes | Selenomonadales | Veillonellaceae | Veillonella      | parvula_denticariosi | OTU_288390       | 52.78%         | 19        | 0.118%         | 78.38%           | 29        | 0.144%         | 61.76%         | 21        | 0.050%         | 58.82%           | 20        | 0.034%         | -10        | 1          |
| Firmicutes    | Negativicutes | Selenomonadales | Veillonellaceae | Megasphaera      | micronuciformis      | OTU_120          | 30.56%         | 11        | 0.107%         | 56.76%           | 21        | 0.039%         | 61.76%         | 21        | 0.126%         | 38.24%           | 13        | 0.112%         | -10        | 8          |
| Firmicutes    | Clostridia    | Clostridiales   | Lachnospiraceae | Blautia          | Ruminococcus_gnavus  | OTU_127554       | 25.00%         | 9         | 0.003%         | 35.14%           | 13        | 0.005%         | 50.00%         | 17        | 0.006%         | 17.65%           | 6         | 0.010%         | -4         | 11         |
| Firmicutes    | Clostridia    | Clostridiales   | Ruminococcaceae | Subdoligranulum  |                      | OTU_143101       | 11.11%         | 4         | 0.006%         | 16.22%           | 6         | 0.001%         | 41.18%         | 14        | 0.002%         | 8.82%            | 3         | 0.000%         | -2         | 11         |

<sup>a</sup> - OTU number was generated as part of VSEARCH sequence clustering

\* - Delta = individuals with OTU present in BLISS group - individuals with OTU present in Control group

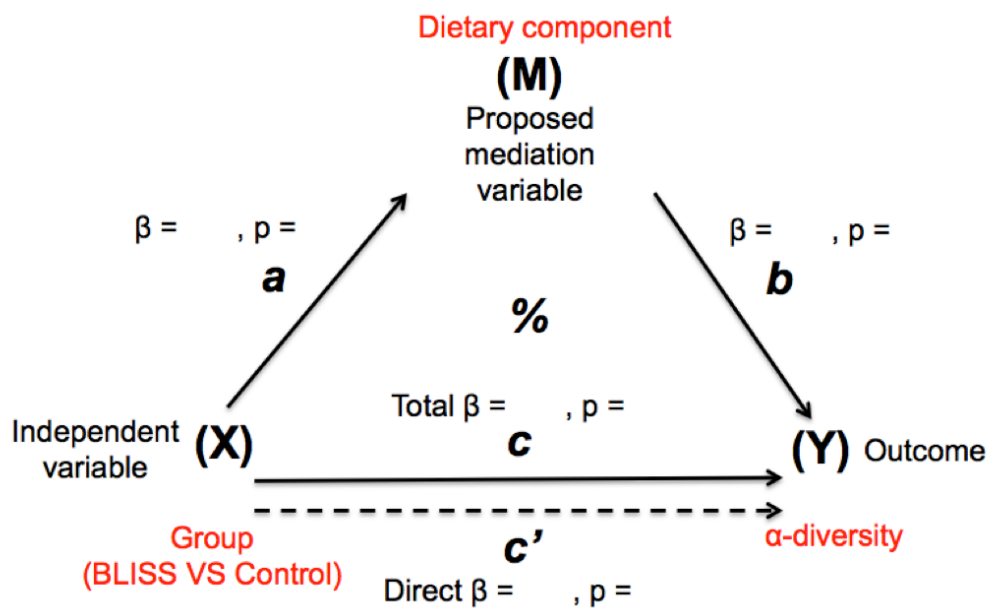

**FIG S.1. Illustration of a single mediation model.**

As adapted from Fairchild and McDaniel [1] and Fairchild and MacKinnon [2].

Note: X= the independent variable; Y= the dependent variable; and M= the mediating variable.  $c=ab+c'$ : The mediation model breaks down the total effect of X on Y (i.e. c), into two parts: the indirect effect of X on Y through M, quantified by  $ab$  (the product of a and b), and the direct effect of X on Y controlling for M, quantified by  $c'$ . %: Represents the proportion of the total effect that is mediated.  $\beta$  is the effect size and p is the p-value for the effect.

## REFERENCES

1. Fairchild AJ, McDaniel HL. 2017. Best (but oft-forgotten) practices: mediation analysis. *Am J Clin Nutr* 105:1259-1271.
2. Fairchild AJ, MacKinnon DP. 2009. A General Model for Testing Mediation and Moderation Effects. *Prev Sci* 10:87-99.
